# Supplementary material for: 1′-O-methyl-averantin isolated from the endolichenic fungus Jackrogersella sp. EL001672 suppresses colorectal cancer stemness via sonic Hedgehog and Notch signaling
Source: PubMed Central journal article supplement (PMC9935543; doi:10.1038/s41598-023-28773-z), 2023-02-16
Supplement: 41598_2023_28773_MOESM1_ESM.pdf [file 41598_2023_28773_MOESM1_ESM.pdf]

## Supplementary Materials

### **1'-O-methyl-averantin isolated from the endolichenic fungus *Jackrogersella* sp. EL001672 suppresses colorectal cancer stemness via sonic hedgehog and Notch signaling**

Mücahit Varlı<sup>1</sup>, Eun-Young Lee<sup>2</sup>, Yi Yang<sup>1</sup>, Rui Zhou<sup>1</sup>, İsa Taş<sup>1</sup>, Sultan Pulat<sup>1</sup>, Chathurika D. B. Gamage<sup>1</sup>, So-Yeon Park<sup>1</sup>, Jae-Seoun Hur<sup>3</sup>, Sang-Jip Nam<sup>2,\*</sup>, Hangun Kim<sup>1,\*</sup>

<sup>1</sup>College of Pharmacy, Sunchon National University, 255 Jungang-ro, Sunchon, Jeonnam 57922, Korea; mucahitvarli@s.scnu.ac.kr (M.V.); yangyi\_520@hotmail.com (Y.Y); zhourui274@gmail.com (R.Z.); mr.isatas@gmail.com (İ.T.); sultanpulat@s.scnu.ac.kr (S.P); chathurika.gamage@gmail.com (C.D.B.G.); sinbu17@naver.com (S.-Y.P.)

<sup>2</sup>Department of Chemistry and Nanoscience, Ewha Womans University, Seoul 03760, Republic of Korea; younglee0124@naver.com (E.-Y.L.); sjnam@ewha.ac.kr (S.-J.N.)

<sup>3</sup>Korean Lichen Res. Institute, Sunchon National University, 255 Jungang-ro, Sunchon, Jeonnam 57922, Korea; jshur1@sunchon.ac.kr (J.S.H.)

\*Correspondences: sjnam@ewha.ac.kr (S.-J.N.); Tel.: +82-2-3277-6805;

hangunkim@sunchon.ac.kr (H.K.); Tel.: +82-61-750-3761

**Supplementary Materials:**

**Supplementary Table 1.**

ITS sequence of *Jackrogersella multiformis* EL001672

**Supplementary Table 2.**

Primer list for q-RT-PCR

**Supplementary Figure 1-3.**

Bioactivity-guided fractionation of a crude extract from EL001672

**Supplementary Figure 4.**

Viability of HEK293T cells treated with 1'-*O*-methyl-averantin

**Supplementary Figure 5-9.**

The NMR datas of 1'-*O*-methyl-averantin

**Supplementary Figure 10-11.**

Full-length blots shown in Figure 3 and Figure 4.

**Supplementary Table 1.** ITS sequence of *Jackrogersella multiformis* EL001672

| Internal transcribed spacer sequence                                                                                                                                                                                                                                                                                                                                                                                                                                                                                                                                                                                                                                                                                                                                                                                                           |
|------------------------------------------------------------------------------------------------------------------------------------------------------------------------------------------------------------------------------------------------------------------------------------------------------------------------------------------------------------------------------------------------------------------------------------------------------------------------------------------------------------------------------------------------------------------------------------------------------------------------------------------------------------------------------------------------------------------------------------------------------------------------------------------------------------------------------------------------|
| TCAAAGGAACCAAGAATTTTTTTTGGATTTTTTATTTTGGTCTTACTTTTTTGGT<br>GGTGGGGCCTTGTTTTCTTTTTTTTTTTGTTTCCTTTCCCGGTTTTGATATGCTT<br>AAGTTCAGCGGGTATTCTACCTAATCCGAGGTCAACCACTAGAAATATAGGG<br>GGTTTTACGGCAGGCAGCTAAGGCGACTGCAGAAGCGAGAAAAGATTTACTAC<br>GCTCAGAGTACGCCATAACTCCGCCACTGACTTTGAGGAGCTACGCTATAACC<br>GTAGGCTCCCAACGCTAAGCTACAGGGCTTAATGGTTCGAAATGACGCTCGAAT<br>AGGCATGCCCACTAGAATACTAATGGGCGCAATGTGCGTTCAAAGATTCGATG<br>ATTCATGAATTCTGCAATTCACATTACTTATCGCATTTTCGCTGCGTTCTTCATC<br>GATGCCAGAACCAAGAGATCCGTTGTTGAAAGTTTTAACTTATTTTTGTTTGGGA<br>GCATTCAGAAATACACTATTTTAAACAGAGTTTAGGGGTCCTCCGGCGGGCCG<br>TGAGCCGGCTACAGGGTAGCCGCCGTTTTACAGGGCGGGCTACAGGGTAGCC<br>GCAGCGAGCGCCGAGGCAACTGGAGGTAAGGTTACATAGGGTTTGGAGTTTA<br>GTTTAACTCTGTAATGATCCCTCCGCTGGTTCACCAACGGAGACCTTGTTACGA<br>CTTTTACTTCTCTAGGAAACCCAAAAAATTGTGGGGGTTAAAAGGAAGGCGA<br>CGCCTACACC |

**Supplementary Table 2.** Primer list for q-RT-PCR

| Gene Symbol | Primers sequences     |                        |
|-------------|-----------------------|------------------------|
|             | For (5'-3')           | Rev (5'-3')            |
| GAPDH       | ATCACCATCTTCCAGGAGCGA | AGTTGTCATGGATGACCTTGGC |
| ALDH1       | TGTTAGCTCATGCCGACTTG  | TTCTTAGCCCGCTCAACACT   |
| CD44        | TGCCGCTTTGCAGGTGTAT   | GGCCTCCGTCCGAGAGA      |
| CD133       | GGACCCATTGGCATTCTC    | CAGGACACAGCATAGAATAATC |
| Lgr-5       | CTCTTCCTCAAACCGTCTGC  | GATCGGAGGCTAAGCAACTG   |
| Msi-1       | ACCAAGAGATCCAGGGGTTT  | TCGTTTCGAGTCACCATCTTG  |
| Gli-1       | CCATACATGTGTGAGCACGA  | GGCACAGTCAGTCTGCTTT    |
| Gli-2       | CAACGCCTACTCTCCAGAC   | GAGCCTTGATGTACTGTACCAC |
| SMO         | CATCCCTGACTGTGAGATCA  | CACCATCTTGGTGACATGCT   |
| Hes-1       | CTGAAGAAAGAT AGCTCGCG | ACTTCCCAGCACACTT       |
| Bmi-1       | CCA GGGCTTTTCAAAAATGA | CCGATCCAATCTGTTCTGGT   |
| EphB-1      | TGCAAGGAGACCTTCAACCT  | CGGTGTTGATTTTCATGACG   |
| Notch-1     | TCAGCGGGATCCACTGTGAG  | ACACAGGCAGGTGAACGAGTTG |

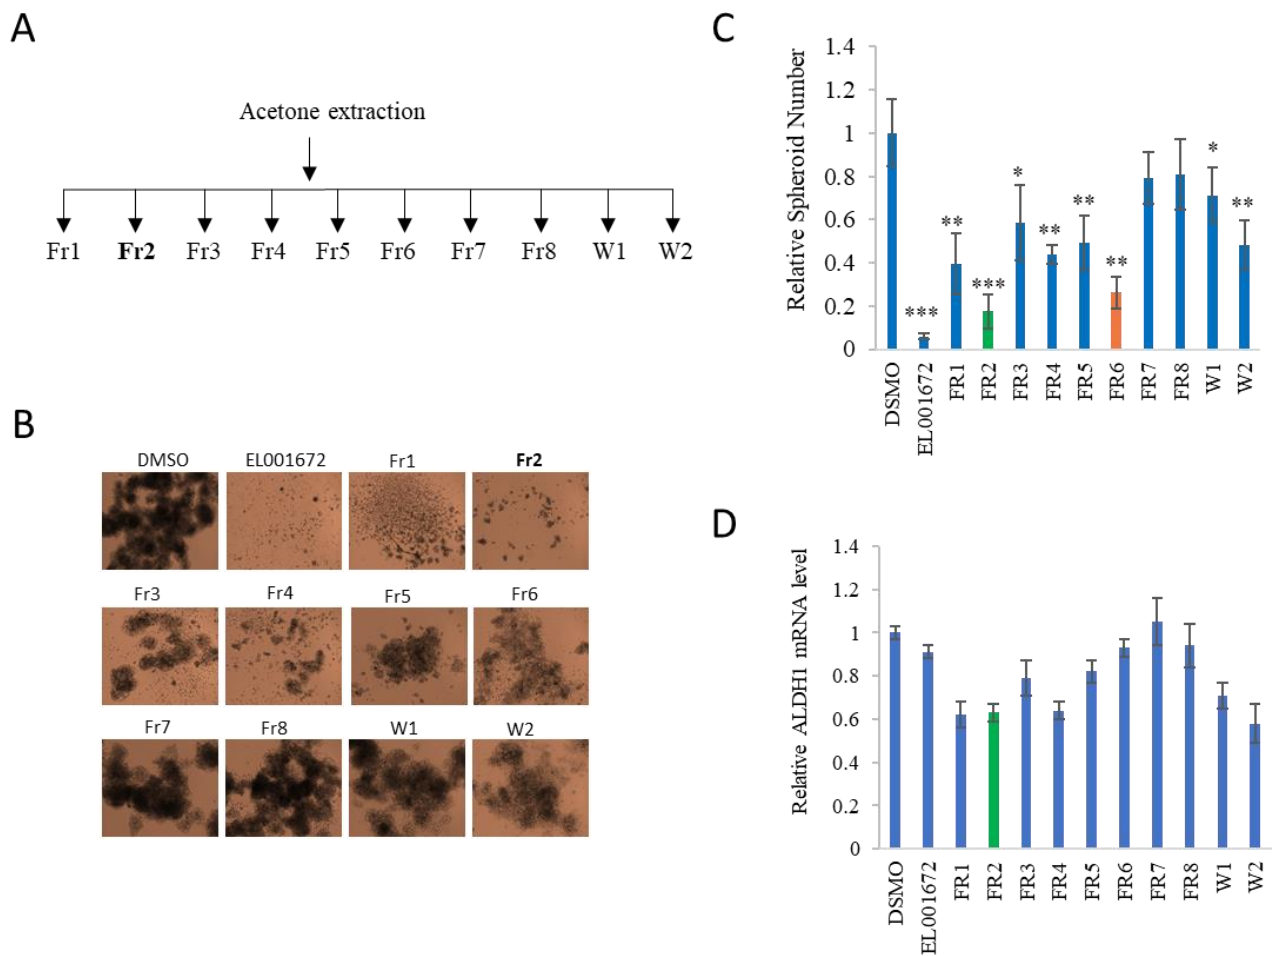

**Supplementary Figure 1.** (A) Flow chart of the fractionation. (B-C) Representative images of spheroid formation of CSC221 cells treated with fractions for 14 days and quantitative analysis of the number of spheroids following each treatment. (D) Quantitative analysis of mRNA expression levels of cancer stem markers aldehyde dehydrogenase-1 (ALDH1).

A

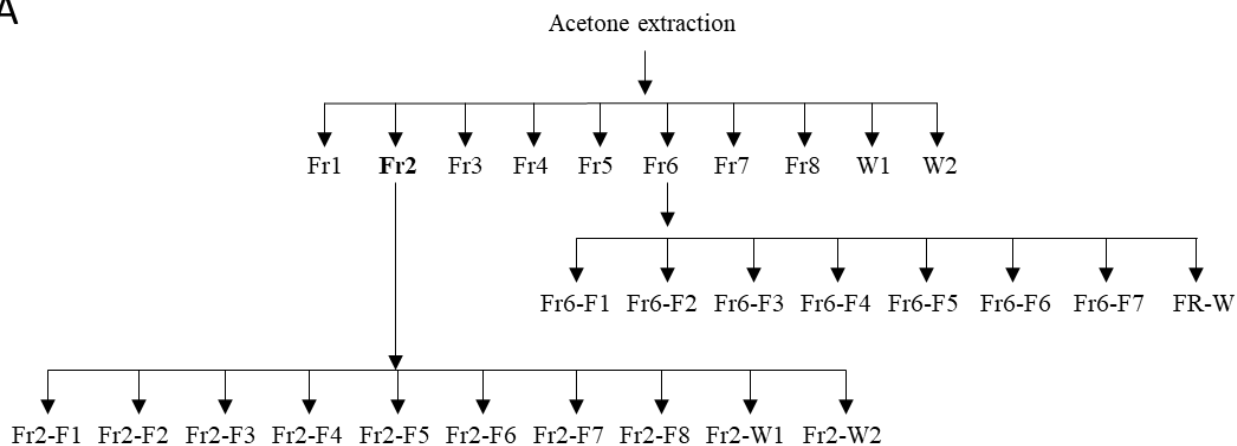

B

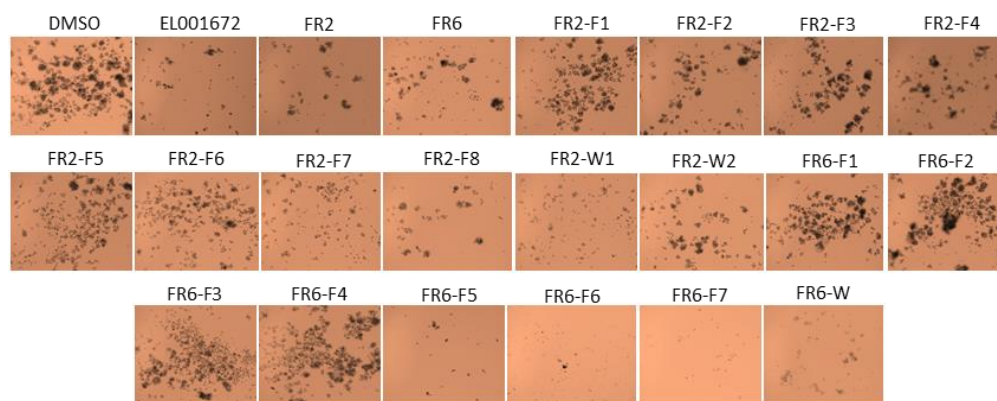

C

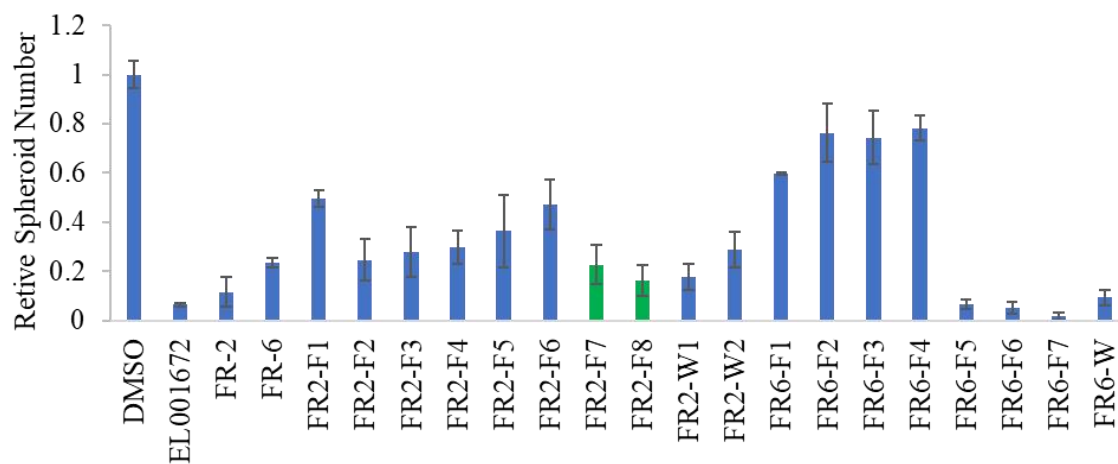

**Supplementary Figure 2.** (A) Flow chart of the fractionation. (B-C) Representative images of spheroid formation of CSC221 cells treated with fractions for 14 days and quantitative analysis of the number of spheroids following each treatment.

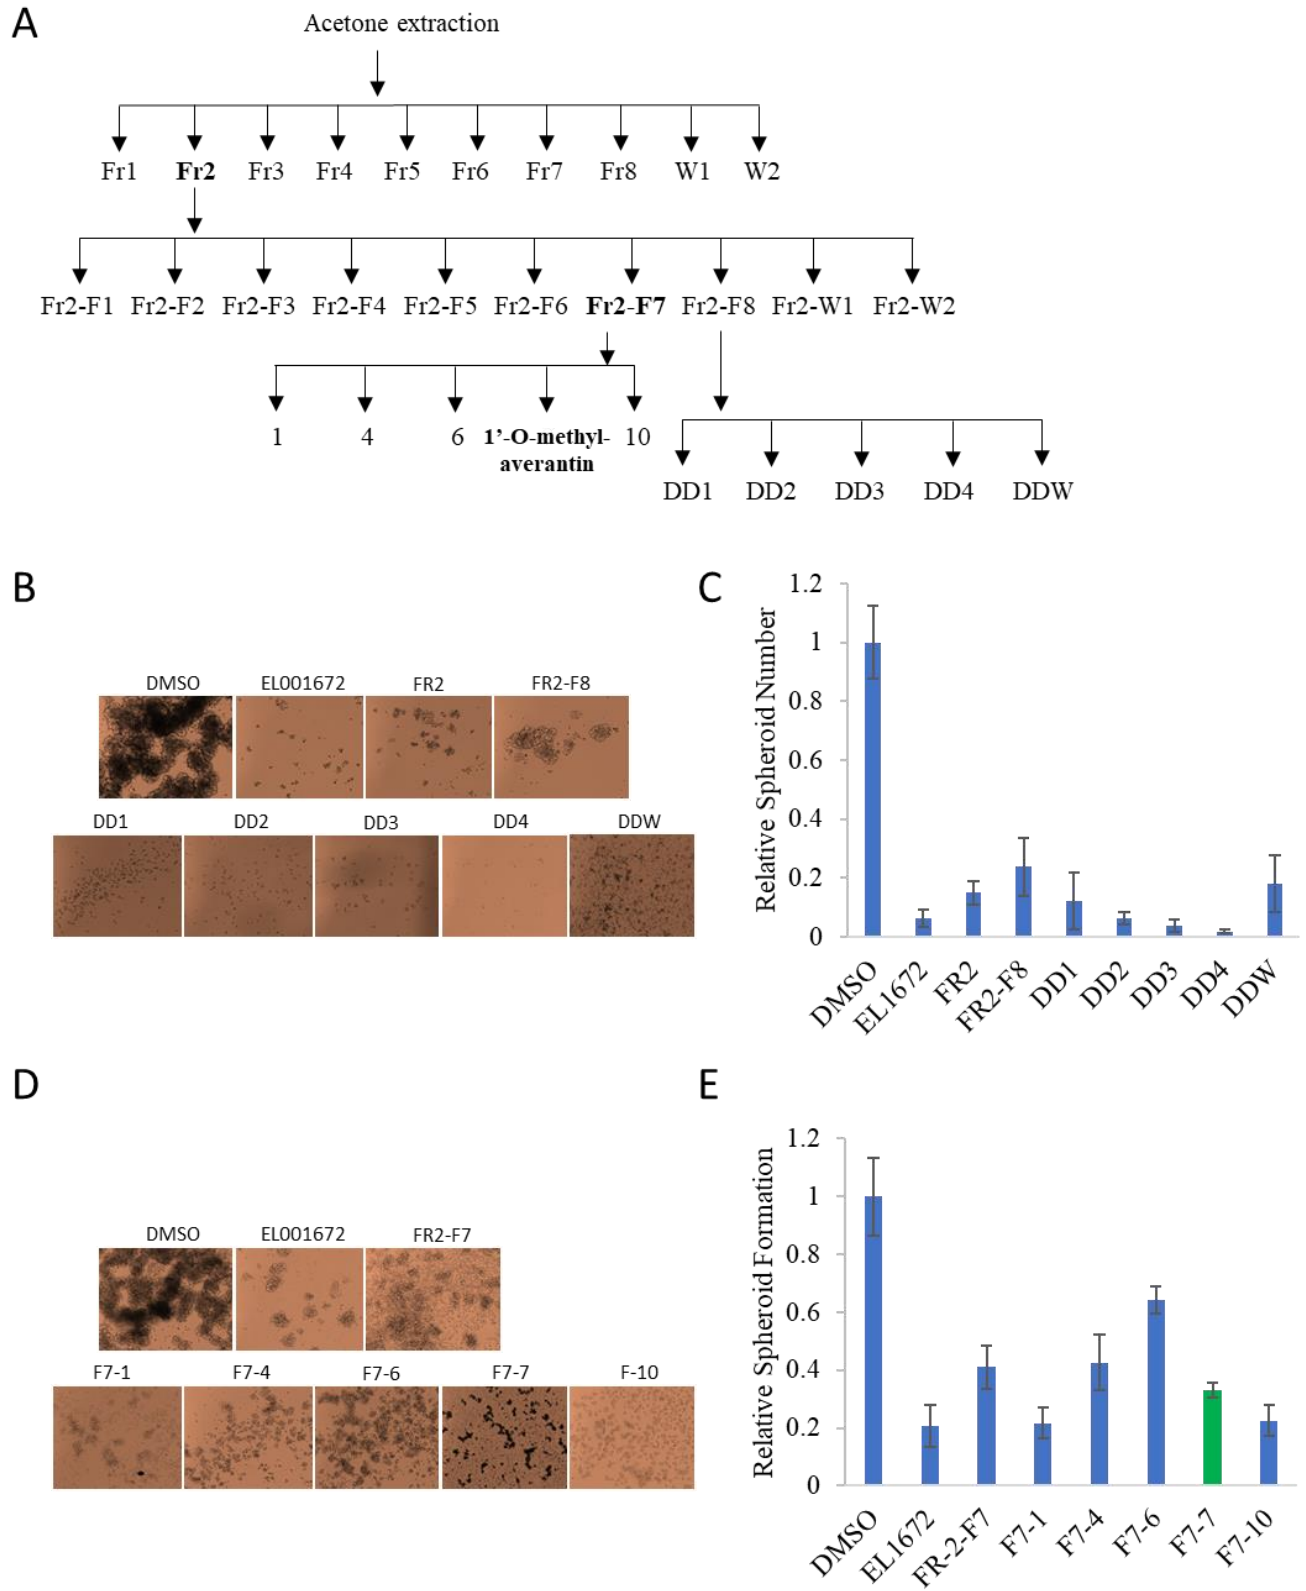

**Supplementary Figure 3.** (A) Flow chart of the fractionation. (B-C) Representative images of spheroid formation of CSC221 cells treated with fractions for 14 days and quantitative analysis of the number of spheroids following each treatment.

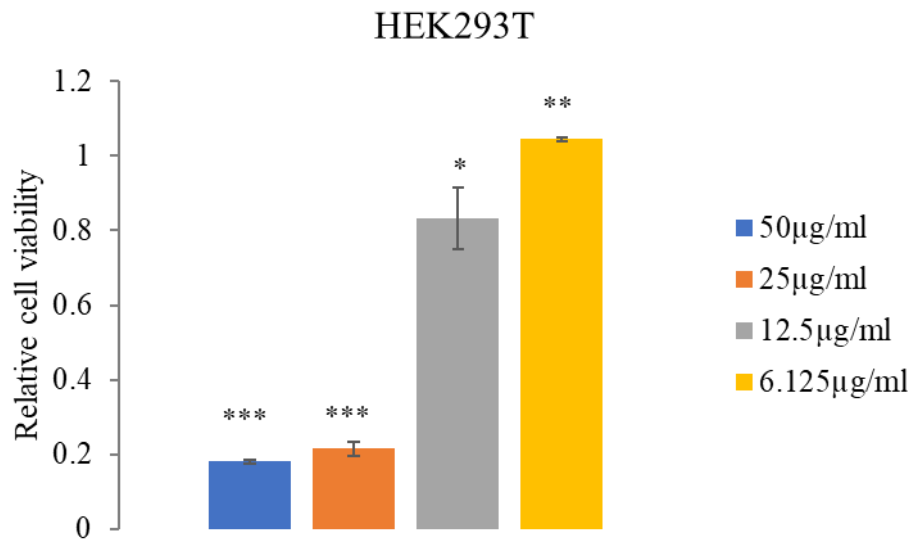

**Supplementary Figure 4.** Viability of HEK293T cells treated with 1'-*O*-methyl-averantin. DMSO used as a control. 50, 25, 12.5 and 6.125 µg/ml 1'-*O*-methyl averantin represent a concentration of 129.49, 64.74, 32.37 and 16.19 µM, respectively. Data represent the mean ± standard error of the mean, \* $p < 0.05$ ; \*\* $p < 0.01$ ; \*\*\* $p < 0.001$  (compared with DMSO treated cells).

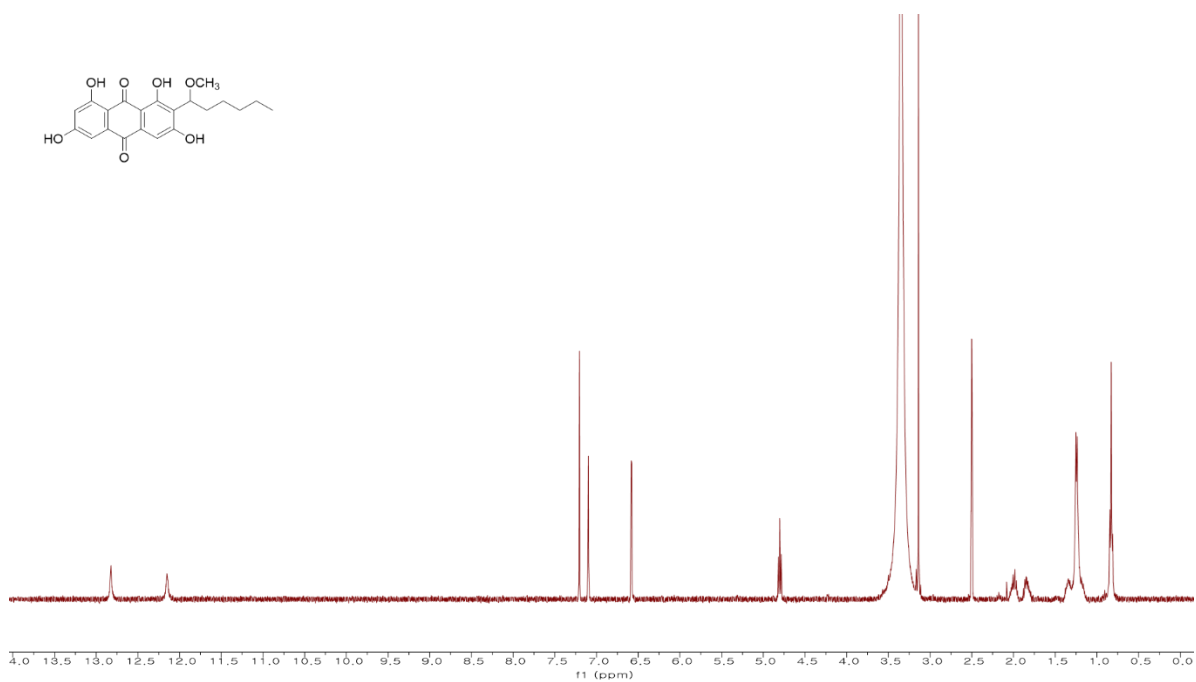

**Supplementary Figure 5.** <sup>1</sup>H NMR spectrum of 1'-*O*-methyl-averantin in DMSO-*d*<sub>6</sub>

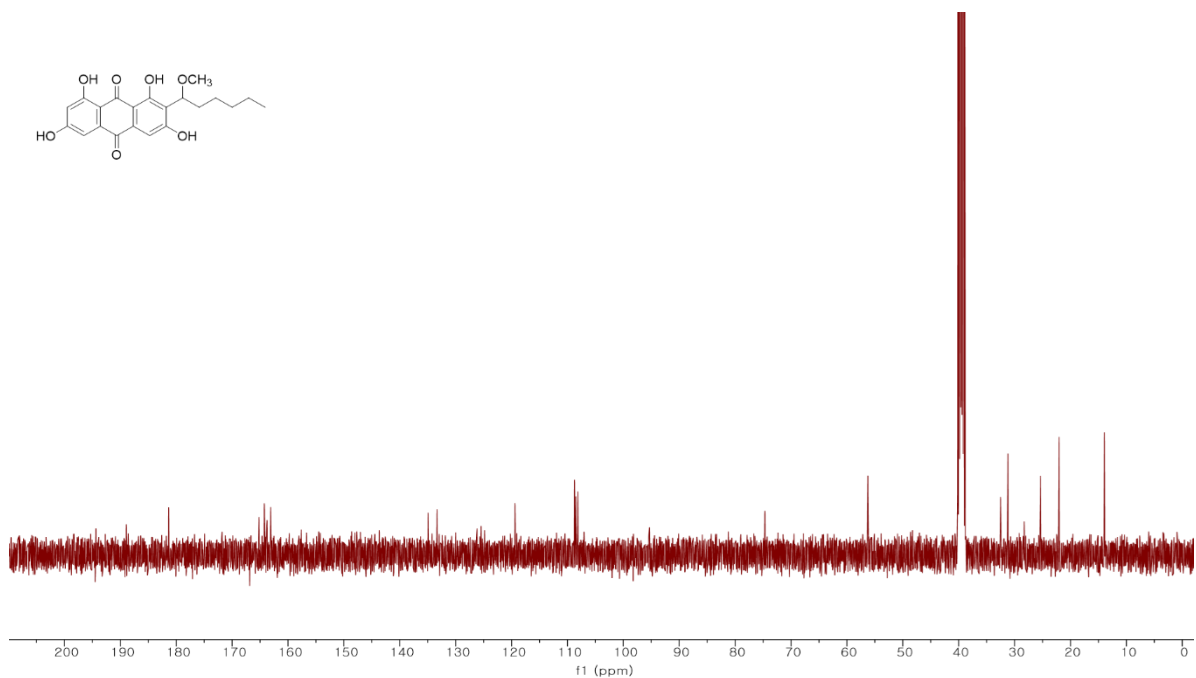

**Supplementary Figure 6.** <sup>13</sup>C NMR spectrum of 1'-*O*-methyl-averantin in DMSO-*d*<sub>6</sub>



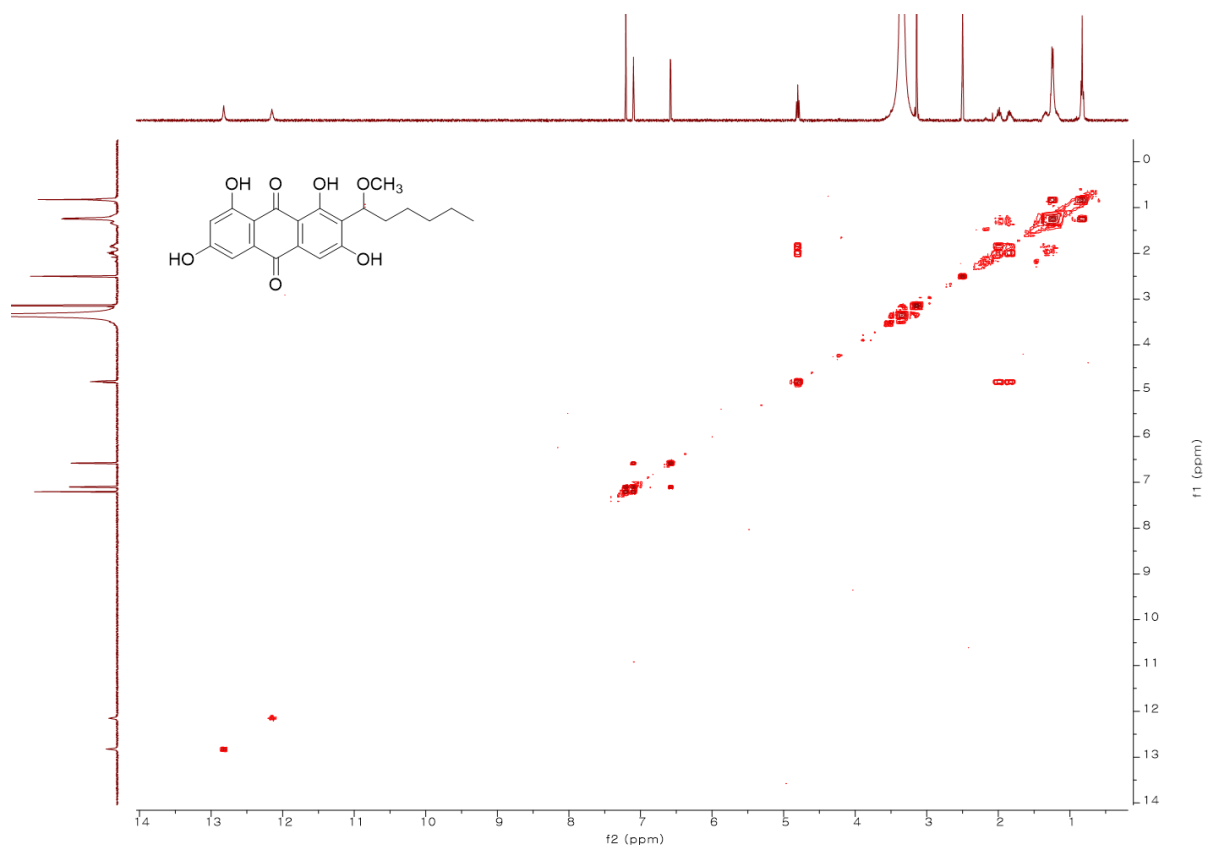

**Supplementary Figure 7.** COSY spectrum of 1'-O-methyl-laverantin in DMSO-*d*<sub>6</sub>

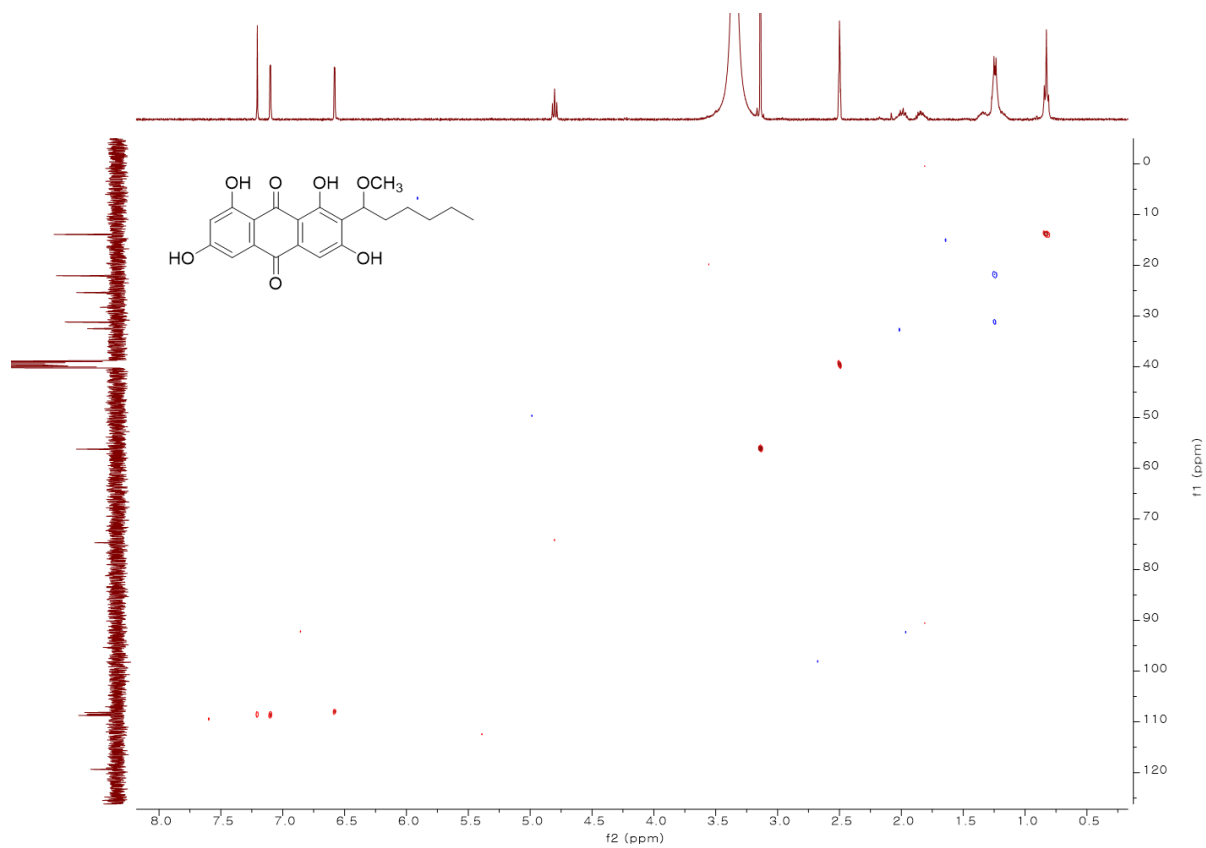

**Supplementary Figure 8.** HSQC spectrum of 1'-O-methyl-averantin in DMSO-*d*<sub>6</sub>

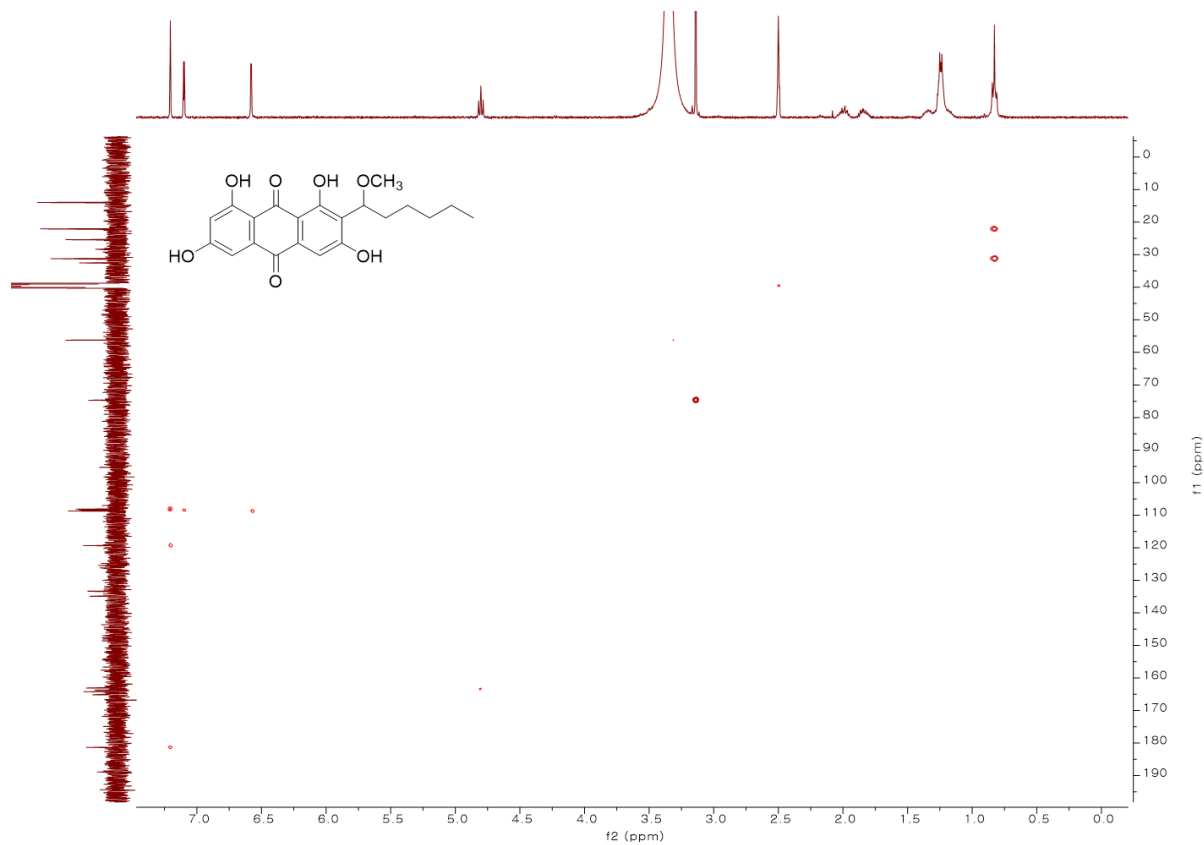

**Supplementary Figure 9.** HMBC spectrum of 1'-O-methyl-averantin in DMSO-*d*<sub>6</sub>

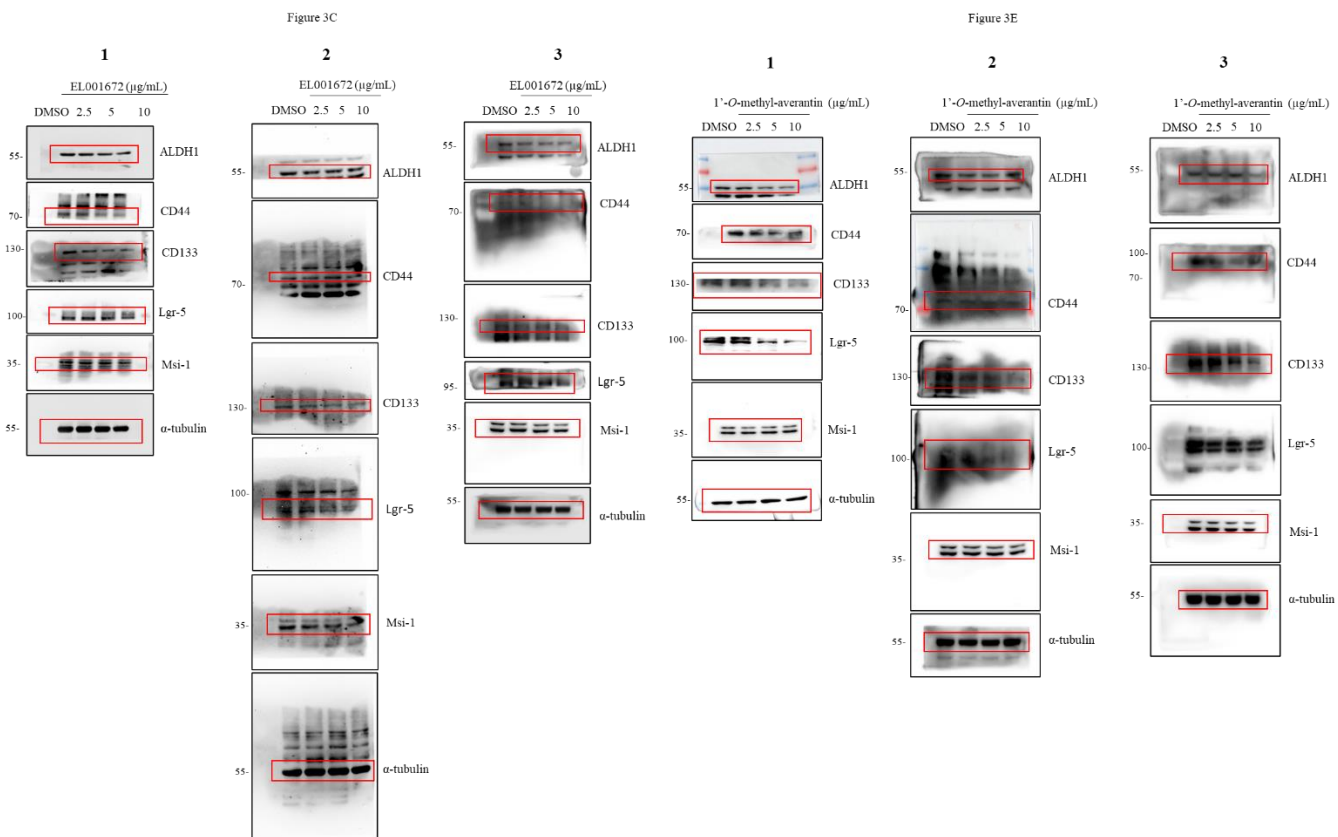

**Supplementary Figure 10.** Western blots in Figure 3 in the manuscript

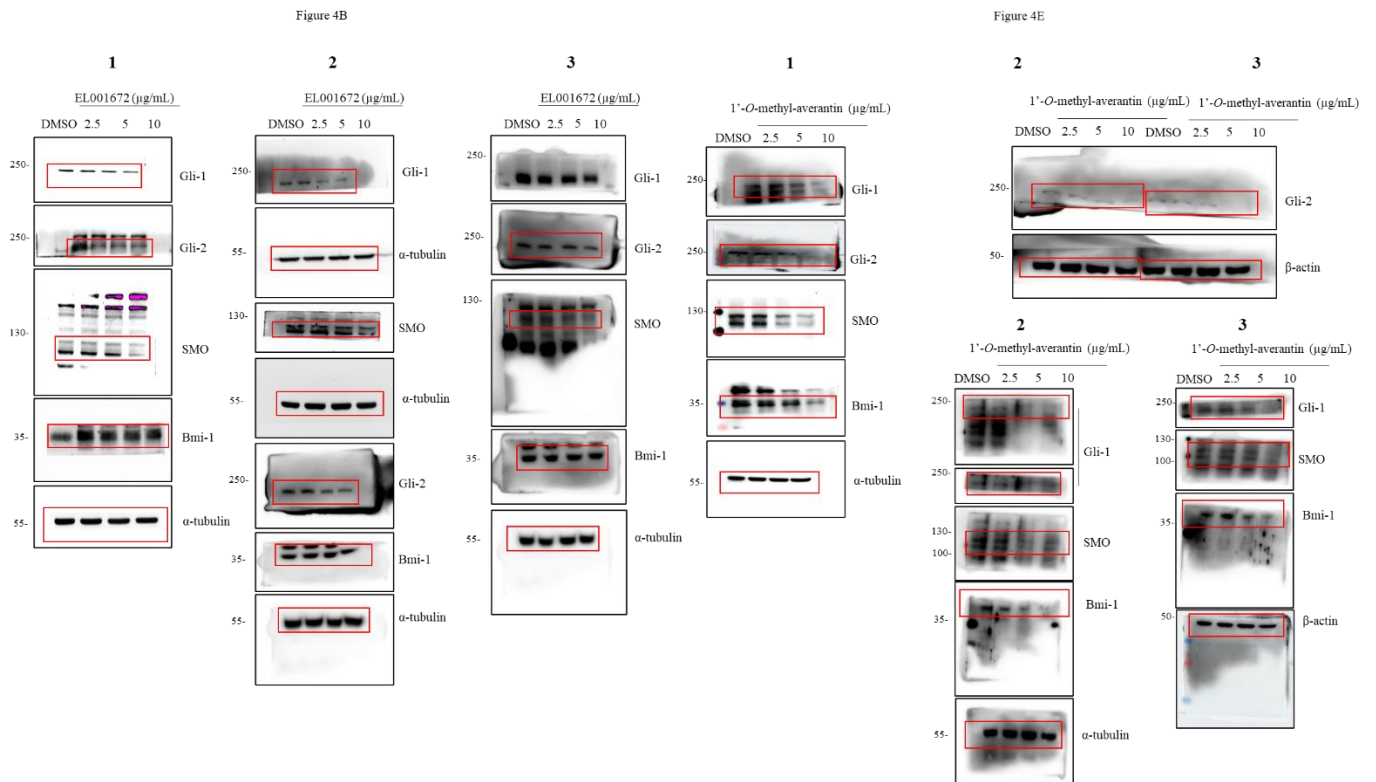

**Supplementary Figure 11.** Western blots in Figure 4 in the manuscript
